# Supplementary material
Source: MDPI journal article supplement (https://www.mdpi.com/1999-4907/14/11/2274)
Supplement: s1 [file s1]

Archive with 3 entries (3 files):
- Supplementary figure.pdf
- table S1.pdf
- Table S2.pdf
