# Supplementary material
Source: MDPI journal article supplement (https://www.mdpi.com/1999-4907/14/11/2274)
Supplement: s1 [file s1]

Table S2 Primer sequences used for qRT-P 1

| Gene name      | Forward primer         | Reverse prime           | product length/bp |
|----------------|------------------------|-------------------------|-------------------|
| GAPDH          | GCGGCTACCTACGATGAAATTA | CTAGACCTGCTGTCACCAATAAA | 125               |
| $\beta$ -Actin | GCCGAACGGGAAATTGTC     | AGAGATGGCTGGAAGAGG      | 188               |
| JrCBF1         | TCCAGGAACCCGAAGAAACG   | CGCGAAATTAAGACAGGCGG    | 231               |
| JrCBF2         | GTGGTCGGTCTGCTTGCCTTAA | AAACAACCTCCGCCGCCTCTG   | 113               |
| JrCBF3         | GAGTCCGCTTCCTTGAACCTCC | GCCTCCATAGCAGCACACTGTA  | 98                |
| JrCBF4         | CGTGTCTCAACTTCGCCGACTC | GCCGCAGCTCTCCTTATCTCCT  | 82                |
| JrCBF5         | AGGTCGGCGTGTCTCAACTTC  | AACAACCTCTGCTGCCTCCTTCG | 107               |
| JrCBF6         | TGGCTTCTTCCACGAGCTAGGT | GCAGGAGGGAGACGATACAACA  | 105               |
| JrCBF7         | TCCCAAGCTCCACGCATATC   | TTGAGCACAGCCTGCATAGT    | 248               |
| JrCBF8         | AGCGCAAGGCAGAACCTTA    | GGTAGCGCGTCACTTTGAAC    | 106               |
