# Supplementary material
Source: MDPI journal article supplement (https://www.mdpi.com/1999-4907/14/11/2274)
Supplement: s1 [file s1]

Table S1 Gene sequences of JrCBF genes.

| Gene ID | Gene sequence                                                                                                                                                                                                                                                                                                                                                                                                                                                                                                                                                                                                                                                                                                                                                                        |
|---------|--------------------------------------------------------------------------------------------------------------------------------------------------------------------------------------------------------------------------------------------------------------------------------------------------------------------------------------------------------------------------------------------------------------------------------------------------------------------------------------------------------------------------------------------------------------------------------------------------------------------------------------------------------------------------------------------------------------------------------------------------------------------------------------|
| JrCBF1  | ATGGATGATTTCTTCCAGTATTCCTCCGATTCCGAAGGTAGCTGTGGTCGCGTCGTC AAC<br>TTGTCTGACGAGGAGGTTCTTTGGCTTCCAGGAACCCGAAGAAACGTGCCGGGAGGAAG<br>AAGTTCAAGGAAACCAGGCACCCGGTCTACCGGGGTGTGAGGAGGAGGAACTCCGGGAAG<br>TGGGTGTGCGAGGTCCGCGAGCCCAATAAGAAGTCCAGGATATGGCTGGGGACGTTCCCG<br>ACTGCCGAGATGGCGGCGCGCTCACGATGTCGCCGAATAGCTCTGCGTGGGCGGTCC<br>GCCTGTCTTAATTCGCGGACTCGGCCTCGAAGTTGCCGAGGCCGGCGTCGGGGGAAGCG<br>AAGGACATTCAGAGGACGGCTGCAGAGGCGGCAGAGGCGTTTCGGCCAGCGGATTGATG<br>GACACTTCGTCGGAACGGTGGCGGAGAATGAGAGGCAATCGTCGGAGGGAGTGTCTTT<br>ATGGATGAAGAAGCAGTGTTTGGGATGCCGGGGTTGCTGGCAAATATGGCAGAGGCGATG<br>CTACTGCCTCCACCATATTGTGCGGGAGATGATGCTTTCAGTGGTGGAGATGACGTGGAA<br>GCTTCAGCTGACATGTCATTATGGAGTTATTCATATAA                                                                                      |
| JrCBF2  | ATGGATGTTTTCTCTCTTATAATTCCCAGACTCCGAGAGTAGTAGCTATGGTCGCGGT<br>CTGAACTTTTCCGACGAGGAGCTTCTGTTGGCTTCCAGGAATCCGAAGAAACGTGCCGGC<br>AGGAAGAAGTTCAAGGAAACCAGGCACCCAGTGTACCGGGGTGTGAGGAGAAGGAACTCC<br>GGCAAGTGGGTATGCGAGGTGCGCCAGCCCAACAAGAAGTCCAGGATATGGCTGGGGACG<br>TTCCCCACTGCCGACATGGCGGCGCGCTCACGATGTCGAGCAATAGCGATGCGTGGT<br>CGGTCTGCTTGCTTAATTCGAGACTCGGTGAGGAGGCTGCCGGTGCCGGCGTCCGGG<br>GATGTGAAGGACATTCAGAGGACTGCTGCAGAGGCGGCGGAGTTGTTTCGACCAGCAGAG<br>TCGTTGGACGGATCAACATCGCAGGCGGAATGA                                                                                                                                                                                                                                                                                            |
| JrCBF3  | ATGGCTATTGGAGAGGAACCATCTTCTTCAACCTTGGACAACCAACGGAGTACTACTTCA<br>CAGTCGCTAGTACTGGAACAGACTAGTTCATGGCAAAGTATCATCACGCGCAAAGTGGC<br>AAGCAAAAGAGAAAGGCAGGAAGAAAAAGTTCCGGGAGACGCGTCACCCGGTCTACAAA<br>GGCGTTCGGCAAAGGAAAGGCAAATGGGTTTGCAGCTGAGGCAACCGAACAACAAATCT<br>CGTATCTGGTTGGGGACCTTTTCACTCCCGGAGATGGCTGCTAGGGCTTACGACGTTGCC<br>GCCCTAGCTCTCAAGGGAGAGTCCGCTTCTTGAACCTCCCTGAAGCGGCATGTGCCCTA<br>CCACGCGTTAAGTCATCATCCTCCATTAGGGATATACAGTGTGCTGCTATGGAGGCCGCA<br>GGGGCATCTTCTACGAAGTAAACCATCTTCTTCACTGTCCTTGTCCAATCATGCTTG<br>GGTATGGTTCCCAAACTTGTAGGATATCGTTTTTGGATGAGGAGGAGTTGTTTAACATG<br>CCGGGATTACTTGACAGCATGGCAGAGGGTTGATCCTCACTCCACCAGCCATGCAAAAG<br>GGCTTCAATTGGGACGGTTTGGAAAATACTGTGGACCTGACTCTATGGAGTGACTGA                                                                     |
| JrCBF4  | ATGCAAAGTTTTAGCGAATTCTCGGACCCCATCCATTGCTCTAATCCGGCGTATATC<br>GAGAAATCGGAGAGTTCTCCCTTGCTGATGCTGGCAGCTCCGCCCAAGAACCACTCAC<br>TCGGACGAGGAAGTTATACTGGCCTCAAGCAGGCCCAAGAAACGCGCTGGCAGGAGGATT<br>TTCAAGGAGACGCGACACCCGGTGTATCGCGGAGTCAGGAAGAGGAATAATAACAAGTGG<br>GTCTGCGAGGTGCGTGAGCCTAACAAGACGTCCAGGATATGGCTCGGGACGTACCCACCC<br>GCTGAGATGGCAGCACGGGCACACGACGTGGCCGCTCTAGCTCTGAGAGGAAGGTCGACG<br>TGTCTCAACTTCGCCGACTCGGCGTGCGGTTGCATTTGCCGGGTTCTAGGGACGCGAAG<br>GAGATAAGGAGAGCTGCGGCGGAGGCGGCGGAGGCCTTTCGGCCAGTGAGTTTCGGCGGG<br>GACTGCGTCGGAGATCTAGGGAAAGAAGAAGTGATCAAGCAATGCCAAGAGAATTACGGA<br>AGTATTGAGAGCTGTGTGCTGGAGGAAACGAAGACTGAGCAGGAAAATGTGTTGTACGTG<br>GACGAAGAGGCACTGTTCAACATGAGGGGCTTGCTAGTGAACATGGCTGAAGGGCTACTA<br>CTGTCCCCACCATCTTGCTAGGAGGTGAAGTCATGGGAATGACATGGGGCTGGATGCT |

|        |                                                                                                                                                                                                                                                                                                                                                                                                                                                                                                                                                                                                                                                                                                                                                                                                                                                                                  |
|--------|----------------------------------------------------------------------------------------------------------------------------------------------------------------------------------------------------------------------------------------------------------------------------------------------------------------------------------------------------------------------------------------------------------------------------------------------------------------------------------------------------------------------------------------------------------------------------------------------------------------------------------------------------------------------------------------------------------------------------------------------------------------------------------------------------------------------------------------------------------------------------------|
|        | GAGGTGTCATTATGGAGTTTCACCATCTAA                                                                                                                                                                                                                                                                                                                                                                                                                                                                                                                                                                                                                                                                                                                                                                                                                                                   |
| JrCBF5 | ATGGATATTTTCCGCCAATACTCAGACCCCAATCCATTTGGGCTGGACCTAGTTTTAAAC<br>GACAAGCCAGAGACTTCCTCGTTGTCTGATGCCGGCACCTTCGAGCGCCGAAGCCGTAC<br>TCAGACGAAGAGGTTAGAGTACTAGCTTCGAGCACGCCAAGAAGCGTGCGGGAAGAAGG<br>ATATTCAACGAGACGCGACACCCAGTGTATCGCGGAGTCAGGAGGAGGAACAAGAACAAA<br>TGGGTCTGCGAAGTGCGCGAACCCAACAAGACCTCGAGGATATGGCTCGGGACGTACCCT<br>ACCGCGGAGATGGCAGCGCGGGCACACGACGTGGCCGCTTTGGCGCTCAGGGGAAGGTCTG<br>GCGTGTCTCAACTTCGCCGACTCGGAGTGGCGGTTGCCTATGCCGAGTTCAACGGACGCG<br>AATGACATAAGGAGGGCAGCGAAGGAGGCAGCAGAGTTGTTTCCACCGAGAGATCATGAG<br>TTTGAGGGGATTGCGGCGAAGAAGCCGGGAAAGTGCTCGTGAAGGATTGTAAAGAGATT<br>TACGGGAGTGTTTCATGATCACAGGTGGAGGCCGAGGAGGAGAAGGCTGTGCAGGAAAAT<br>GCGATTTACTTGGACGAGGAGGCCCTGTTTCGACACGCGAGGCTTTCTAGTGAATATGGCC<br>GAAGGGCTTCTACTATCTCCACCTCCTTGTCAGACGAAAAATTGCAATGGGATGACATG<br>GGAAGTGAGGCTGAGTTTTCGTTGTGGAGTTTCTCGACCTGA                                         |
| JrCBF6 | ATGGACTCTGAGAATATTCAGTCTTTGTCTTCCTTATCATCATCATCTTCCTCATGC<br>CATCTTTCTCCATGCAGCGCATGGCATAACCCTAACGCTCCATTAATATCCCAGGATCCA<br>TGCATATCATCACAGAAGCTAATTAAGCTGGGAGAAAGAAGTACAAAGTGACGCGCCAC<br>CCAATATACAGAGGTGTTTCGGCAAAGAAACGGCAAAAATATGGGTTTCTGAAGTACGTACT<br>GGACCGAAAAGTAAGTCGAGAATATGGTTGGGGACTTATGCTACCCAGAAATGGCAGCT<br>AGGGCATATGATGCGGCTGCCTTAGCAATTCGAGGAACTATGGCTGTGCTCAATTTTCCT<br>GACTCAGCTTGGCTTCTTCCACGAGCTAGGTCATCTTCTCCTAGGGATATACAAGTGGCC<br>GCTTTAATGGCTGCTAAGGCTTTTACGCCAGGTGTTGTATCGTCTCCCTCCTGCTTCTCC<br>AGTACTACCCTTCTACCCAAAAAAACCCAAGATAAGGTTTTGGAAACTTCCAAGGGAGAG<br>AACAAAGATCAGAAGGTCTTAGAACCTTTGTCATTAGAAATTGTCTCTGCTAATAAGATC<br>TCCTCCTCTGATGATGAAGAGGTTTCAAACCAGTATAGTACGTTTTTCTTGACGAGGAA<br>GCATTGTTCAATATGCCAGGTTTATTGGACAGCATGGCGGAGGGCTTGATTCTTACCCA<br>CCAGCTATAGGTACTAGAGGATTTGATTGGGATGATCATGACTTTGCATGTGACATGGAT<br>TTGACTTTATGGAGCGATTGA |
| JrCBF7 | ATGGACTCTGATAATATTCAGTCTTTGTCTTCCTTATCATCATCTAATTCCTCATGCCAG<br>CTTTCTCCATGCAGTGCATGGTATAACCCTAACCTCCATTAATATCCCAAGCTCCACGC<br>ATATCATCACAGAAGCGAATTAAGTCGGGAGAAAGAAGTACAAAGTGACGCGCCACCCA<br>TTATACAAGGGCGTTTCGGCAAAGAAACGGCAAAAATTGGGTTTCTGAAATACGTACTGGA<br>CCGAAAAGTAAGTCGAGAATATGGTTGGGGACTTATGCTACCCAGAAATGGCAGCTAGG<br>GCATATGATGCGGCTGCCTTAGCAATTCGAGGAACTATGCAGGCTGTGCTCAATTTTCCT<br>GACTCAGCTTGGCTTGTTCACGAGCTAGGTCGTCTTCTCCTAGGGATATACAGGAGGCT<br>GCTTTCATGGCCGCTGAGGCTTTTAGGCCAGGCGTTGTATCGTCTTCTCCTGCTCCTCC<br>AATACTACTGATCTTCTACCCAATAAGACCAAAGATAAGGTTTTGGAAACTTCCAAGAGA<br>GAGAACAAAGATCAGAAGGTCTTAGAACCTTTGTCATTAGAAATTATCTCTGCTAATAAG<br>AGCTCCTCTGATGATGATGAAGAGGTTCCAAACCAGTATAGTACGTTTTTCTTGACGAG<br>GAAGCATTGTTCAATATGCCAGGTTTATTGGACAGCATGGCGGAGGGCTTGATTCTTACA<br>CCACCAGCTATAGGTAGAGGATTTGATTGGGATGATCATGACTTTGCATGTGACATGGAC<br>TTGACTTTATGGAGCGATTGA |
| JrCBF8 | ATGGACTCTGAGAATATTCAGCCTTTATCTTCCTCATCATCATCTAATTCCTCATGCCAG<br>CTTTCTCCATGCAGCGCAAGGCAGAACCTTAACCCTCCATTAATATCCCAAGCTCCATGC                                                                                                                                                                                                                                                                                                                                                                                                                                                                                                                                                                                                                                                                                                                                                     |

|  |                                                                                                                                                                                                                                                                                                                                                                                                                                                                                                                                                                                                                                                                                                                                                   |
|--|---------------------------------------------------------------------------------------------------------------------------------------------------------------------------------------------------------------------------------------------------------------------------------------------------------------------------------------------------------------------------------------------------------------------------------------------------------------------------------------------------------------------------------------------------------------------------------------------------------------------------------------------------------------------------------------------------------------------------------------------------|
|  | ATATCATCACAGAAGCGCATTAAATTCGGGAGAAAGAAGTTCAAAGTGACGCGCTACCCA<br>TTATACAAGGGTGTTTCGGCAAAGAAACGGCAAAAATTGGGTTTCTGAAGTATGTACTGGA<br>CAGAAAAGTAAGTCAAGAATATGGCTGGGGACTTATGCTGCCCCAGAAATGGCAGCTAGG<br>GCATATGATGCGGCTGCCTTAGCAATTCGAGGAACTATGGCTGTGCTCAATTTTCCTGAC<br>TCAGCTTGGCTTGTTCCGCGAGCTAGGTCATCTTCTCCTAGGGATATACAGGAGGCCGCT<br>TTCATGGCTGCTGAGGCTTTTAGGCCAGGCGCTGTATCGTCTTCCTCCTGCTCCTCCAAT<br>ACTACTGATCTTCTACCCAATAAGACCAAACATAAGGTTTTGGAACTTCCAAGAGAGAG<br>AACAAAGATCAGAAGGTCTTAGAACCTTTGTCATTAGAAATTATCTCTGCTAATAAGAGC<br>TCCTCTGATGATGATGAAGAGGTTCCAAACCAGTATAGTACGTTTTTCTTGACGAGGAA<br>GCATTGTTCAATATGCCAGGTTTATTGGACAGCATGGCGGAGGGCTTGATTCTTACACCA<br>CCAGCTATAGGTAGAGGATTTGATTGGGATGATCATGACTTCGCATGTGACATGGACTTG<br>ACTTTATGGAGCGATTGA |
|--|---------------------------------------------------------------------------------------------------------------------------------------------------------------------------------------------------------------------------------------------------------------------------------------------------------------------------------------------------------------------------------------------------------------------------------------------------------------------------------------------------------------------------------------------------------------------------------------------------------------------------------------------------------------------------------------------------------------------------------------------------|
