# Supplementary material
Source: MDPI journal article supplement (https://www.mdpi.com/1999-4907/14/11/2274)

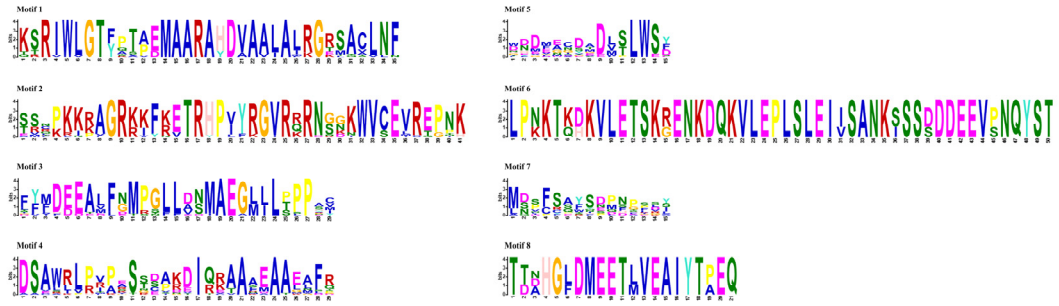

Figure S1 Conserved motifs of JrCBF proteins derived from the MEME Suite.

Supplement: s1 [file s1 › Supplementary figure.pdf]
